# Supplementary material
Source: Elsevier journal article supplement (https://www.sciencedirect.com/science/article/pii/S0300893218300034)
Supplement: mmc1 [file S0300893218300034:mmc1.pdf]

## **MATERIAL SUPLEMENTARIO**

### **ESTRATIFICACIÓN DEL RIESGO HEMORRÁGICO SEGÚN EL TIPO DE INTERVENCIÓN**

En la tabla 1 del material suplementario al final de este documento se consideran procedimientos de riesgo hemorrágico bajo aquéllos donde la hemostasia se puede realizar de forma adecuada, un posible sangrado no supone un riesgo vital para el paciente ni compromete el resultado de la cirugía y no requiere transfusión. El riesgo hemorrágico moderado define procedimientos donde la hemostasia quirúrgica puede ser difícil y la hemorragia aumenta la necesidad de transfusión o reintervención. Por último, el riesgo hemorrágico alto se ha definido como aquel donde la hemorragia perioperatoria puede comprometer la vida del paciente o el resultado de la cirugía.

Cabe destacar que la gran mayoría de procedimientos considerados de alto riesgo hemorrágico, excepto neurocirugía o casos especiales, pueden realizarse sin la suspensión de aspirina o con la mínima interrupción de fármacos inhibidores de P2Y<sub>12</sub>, si el riesgo trombótico es alto (ver manuscrito principal)<sup>1-10</sup>.

## **FÁRMACOS ANTITROMBÓTICOS**

### **Fármacos anticoagulantes**

Existen diferentes tipos de anticoagulantes, algunos de administración parenteral y otros de administración oral. En el seno de este documento solo nos referiremos al manejo de anticoagulantes orales dado que son los que más frecuentemente se usan de forma ambulatoria y más dudas generan en su manejo ante un procedimiento invasivo o quirúrgico.

### ***Fármacos antagonistas de la vitamina K***

Los fármacos antagonistas de la vitamina K (AVK), acenocumarol y warfarina, interfieren con la  $\gamma$ -carboxilación de factores de coagulación vitamina K dependientes (factores II, VII, IX y X), así como la proteína C y S<sup>11</sup>. Tanto acenocumarol como warfarina son absorbidos rápidamente en el tracto gastrointestinal con una biodisponibilidad superior al 60%. La máxima actividad, tras administrar una dosis de acenocumarol, se obtiene a las 36-48 horas y con warfarina a las 72-96 horas. La duración de la acción de acenocumarol es de unos 2 días y de la warfarina de entre 2 y 5 días, de ahí que, en caso de precisar su suspensión, se deban interrumpir previo al procedimiento de manera general 3 días acenocumarol y 5 días warfarina<sup>12</sup>. Al ser extensamente metabolizado en el hígado, la función renal apenas influye sobre la eliminación del fármaco. La respuesta a los AVK y la dosis necesaria para conseguir su efecto terapéutico es muy variable según el paciente lo que obliga a su monitorización de forma estrecha mediante la Razón Normalizada Internacional (INR en inglés). Además, un mismo paciente puede precisar temporalmente una dosis diferente de AVK para alcanzar el mismo efecto, siendo las causas más frecuente las interacciones medicamentosas y los cambios en la dieta<sup>13,14</sup>.

### ***Fármacos anticoagulantes orales de acción directa (ACOD)***

Los anticoagulantes de acción directa (ACOD) disponibles actualmente en nuestro país son dabigatrán, rivaroxabán, apixabán y edoxabán. Estos fármacos inhiben sus dianas terapéuticas (la trombina o el factor Xa) directamente, en lugar de a través de un cofactor u otros mecanismos indirectos lo que hace que se denominen anticoagulantes directos<sup>15-18</sup>. Las características farmacológicas y farmacocinéticas de estos fármacos se recogen en la tabla 2.

Estos fármacos presentan un efecto predecible sobre la coagulación lo que obvia la necesidad de monitorización. Por otro lado, presentan menos interacciones tanto farmacológicas como con alimentos. Se ha aprobado su uso en profilaxis del tromboembolismo venoso después de cirugía programada de reemplazo total de rodilla o cadera, en tratamiento y prevención de las recurrencias de trombosis venosa profunda y embolia de pulmón, y en prevención de ictus o embolia sistémica en pacientes con fibrilación auricular no valvular (definida como aquella que presentan los pacientes que no son portadores de una prótesis mecánica o una estenosis mitral reumática hemodinámicamente significativa). Dado que su eliminación se produce principalmente por vía renal (principalmente dabigatrán, en menor medida el resto), este será un dato fundamental que determinará en qué momento habrá que suspender el tratamiento anticoagulante previo a una intervención<sup>19,20</sup>.

### **Fármacos antiagregantes**

Existen en la actualidad 2 grupos principales de fármacos antiagregantes orales aprobados y recomendados por las guías de práctica clínica para su uso: a) el ácido acetilsalicílico o aspirina como inhibidor de la ciclooxigenasa (COX)-1; y b) los antagonistas del receptor plaquetario P2Y<sub>12</sub> de adenosín difosfato (ADP): ticlopidina, clopidogrel, prasugrel y ticagrelor. Otros antiagregantes orales como los inhibidores de fosfodiesterasas (p.ej. triflusal, dipiridamol o cilostazol), que no poseen una indicación formal para ser empleados en cardiopatía isquémica, o el vorapaxar, un inhibidor selectivo del receptor plaquetario de trombina PAR-1 que, pese a estar aprobado en prevención secundaria en pacientes con infarto de miocardio previo, tiene un uso prácticamente inexistente en nuestro medio, no serán tratados de manera específica en el presente documento.

#### *Ácido acetilsalicílico*

El ácido acetilsalicílico o aspirina bloquea de manera irreversible la enzima COX-1, con lo que inhibe la formación de tromboxano A<sub>2</sub>, un mediador potente de la fase de activación plaquetar<sup>21</sup>. La aspirina está indicada como prevención secundaria de manera indefinida tras un

evento isquémico en pacientes con enfermedad coronaria, cerebrovascular y arterial periférica<sup>22-24</sup>. Es importante resaltar que el uso de aspirina o de cualquier otro antiagregante como prevención primaria en pacientes sin enfermedad cardiovascular no está indicado en la actualidad por incrementarse el riesgo hemorrágico sin un evidente beneficio clínico<sup>25</sup>. Al tratarse de un fármaco con un mecanismo de acción irreversible, la duración teórica del efecto es de 7-10 días (tiempo de recambio de las plaquetas circulantes), aunque el funcionalismo plaquetario se va recuperando paulatinamente a partir de la interrupción de la medicación, siendo prácticamente completo al tercer día<sup>25</sup>.

### *Antagonistas del receptor P2Y<sub>12</sub>*

La doble antiagregación plaquetaria (DAP), en concreto la asociación de aspirina y un antagonista del receptor plaquetario P2Y<sub>12</sub>, es el tratamiento antitrombótico de elección tras un síndrome coronario agudo (SCA) y/o intervencionismo coronario percutáneo (ICP). Las actualizaciones recientes sobre antiagregación de la Sociedad Europea de Cardiología recomiendan, en los pacientes con enfermedad coronaria estable en los que se realiza ICP, mantener la DAP durante 6 meses, independientemente del *stent* implantado, metálico (SM) o liberador de fármaco (SLF), indicando la reducción a 1-3 meses si existe alto riesgo de sangrado<sup>26</sup>. No obstante, esta recomendación puede generar controversia, pues ha sustituido a la anterior (también presente en las actuales guías americanas) de mantener la DAP 1 mes tras implante de SM<sup>27</sup>. Como excepción, tras el implante de un armazón vascular bioabsorbible (AVB), la duración recomendada de DAP es de al menos 12 meses<sup>26</sup>. En los pacientes con un SCA, independientemente de la estrategia de revascularización y del tipo de *stent* implantado, la duración generalmente recomendada de la DAP es de 12 meses<sup>22,23</sup>. Sin embargo, cabe señalar que, basándose en los perfiles de riesgo isquémico y hemorrágico individuales, se puede considerar acortar (3-6 meses) o alargar (más de 1 año) la duración de la DAP en pacientes seleccionados<sup>26,27</sup>.

Entre los inhibidores del receptor plaquetario de ADP P2Y<sub>12</sub> actualmente autorizados para uso clínico en asociación con aspirina en SCA o ICP se encuentran los pertenecientes al grupo de las tienopiridinas (ticlopidina, clopidogrel y prasugrel) y el ticagrelor. Las tienopiridinas son

profármacos que necesitan una biotransformación hepática para convertirse en un metabolito activo responsable de la inhibición irreversible del receptor P2Y<sub>12</sub>, implicado en la amplificación de la fase de agregación plaquetar y la estabilización del agregado plaquetario<sup>28</sup>. El clopidogrel (tienopiridina de segunda generación) reemplazó rápida y mayoritariamente en la práctica clínica a la ticlopidina debido a su mejor perfil de seguridad, especialmente en lo referente a toxicidad hematológica<sup>29</sup>. Cabe recordar que el clopidogrel (el 15% del total absorbido, eliminándose el resto por esterasas plasmáticas) se transforma en el hígado en su metabolito activo mediante un proceso de oxidación en dos etapas por isoformas del citocromo P450 (CYP)<sup>28</sup>. Estas características condicionan un inicio de acción lento, por lo que se requiere el empleo de una dosis de carga (generalmente 300-600 mg) para acortarlo cuando se necesita una inhibición plaquetaria rápida, como podría ser en el contexto de un SCA o un ICP. Las características farmacológicas de los antagonistas orales del receptor P2Y<sub>12</sub> se resumen en la Tabla 2. El clopidogrel se recomienda, en combinación con aspirina, en pacientes con cardiopatía isquémica estable en los que se realiza ICP y en pacientes con un SCA (se realice o no ICP)<sup>22,23</sup>, pudiendo encontrarse también en la práctica clínica su prescripción en monoterapia de forma crónica como prevención secundaria en pacientes con alergia o intolerancia a aspirina. Dado que la inhibición del receptor P2Y<sub>12</sub> es irreversible, los efectos del clopidogrel pueden persistir durante toda la vida de la plaqueta (7-10 días), aunque con una importante variabilidad interindividual a la hora de recuperar la función plaquetaria.

El prasugrel (tienopiridina de tercera generación) es un profármaco que requiere también metabolización hepática para dar lugar a su metabolito activo, que es el que ejercerá un bloqueo irreversible del receptor P2Y<sub>12</sub><sup>28</sup>. La conversión en metabolito activo del prasugrel es más eficiente (un solo paso hepático) que la de clopidogrel, por lo que, dada la equipotencia de los metabolitos activos de ambos fármacos, se consigue una mayor inhibición plaquetaria con prasugrel, además de ser más rápida y con menor variabilidad, que la obtenida con clopidogrel<sup>28</sup>. El prasugrel, en combinación con la aspirina, está indicado para la prevención de eventos aterotrombóticos en pacientes con un SCA sometidos a ICP, recomendando las guías que en pacientes con SCA sin elevación del segmento ST el prasugrel se administre tras conocer la anatomía coronaria<sup>22,23,30</sup>.

El ticagrelor, una ciclopentiltriazolopirimidina, inhibe de manera directa (sin necesidad de un metabolito activo, aunque un 30-40% de su efecto es atribuible a metabolitos generados a nivel hepático) y reversible, a diferencia de las tienopiridinas, el receptor P2Y<sub>12</sub><sup>28</sup>. Entre sus características farmacológicas destacan un inicio de acción más rápido y una inhibición de la agregación plaquetaria más potente que la obtenida con clopidogrel. El ticagrelor, en combinación con la aspirina, está indicado para la prevención de eventos aterotrombóticos en pacientes con SCA de riesgo moderado a alto independientemente de si se realiza o no revascularización (dosis de 90mg/12h) y en pacientes con antecedentes de infarto de miocardio previo y alto riesgo de desarrollar un acontecimiento aterotrombótico (dosis de 60mg/12h)<sup>31,32</sup>.

**Tabla 1 del material suplementario. Estratificación del riesgo hemorrágico según el tipo de intervención**

| RIESGO HEMORRÁGICO    |                                                                                                                                                                                                                                                                                                                                                                                                                                                                                                                                                                                                                 |                                                                                                                                                                                                                                                                                                                                                                                                                                                                                                                                                                                                             |                                                                                                                                                                                                                                                                                                                                                                                                                                                    |
|-----------------------|-----------------------------------------------------------------------------------------------------------------------------------------------------------------------------------------------------------------------------------------------------------------------------------------------------------------------------------------------------------------------------------------------------------------------------------------------------------------------------------------------------------------------------------------------------------------------------------------------------------------|-------------------------------------------------------------------------------------------------------------------------------------------------------------------------------------------------------------------------------------------------------------------------------------------------------------------------------------------------------------------------------------------------------------------------------------------------------------------------------------------------------------------------------------------------------------------------------------------------------------|----------------------------------------------------------------------------------------------------------------------------------------------------------------------------------------------------------------------------------------------------------------------------------------------------------------------------------------------------------------------------------------------------------------------------------------------------|
|                       | BAJO                                                                                                                                                                                                                                                                                                                                                                                                                                                                                                                                                                                                            | MODERADO                                                                                                                                                                                                                                                                                                                                                                                                                                                                                                                                                                                                    | ALTO                                                                                                                                                                                                                                                                                                                                                                                                                                               |
| <b>ANESTESIOLOGÍA</b> | <ul style="list-style-type: none"> <li>• Infiltración local*</li> <li>• Bloqueos fasciales: ilio-inguinal, ilio-hipogástrico, transverso del abdomen, fascia lata</li> <li>• Bloqueos superficiales: bloqueos a nivel del antebrazo, digitales, safeno a nivel de la rodilla, bloqueos nerviosos en tobillo</li> <li>• Bloqueos superficiales perivascuales compresible: poplíteo, femoral, axilar</li> <li>• Anestesia ocular: tópica y peribulbar*</li> <li>• Infiltraciones articulares o músculo-esqueléticas</li> <li>• Infiltraciones en punto-gatillo</li> <li>• Infiltraciones sacro-ilíacas</li> </ul> | <ul style="list-style-type: none"> <li>• Bloqueos profundos: plexo celíaco, ganglio estrellado, proximal de plexo ciático, obturador, infraclavicular, supraclavicular</li> <li>• Bloqueos superficiales perivascuales NO compresibles: intercostal, interescalénico</li> <li>• Anestesia ocular: retrobulbar</li> <li>• Infiltración epidural con corticoides (interlaminar, transforaminal)</li> <li>• Bloqueo nervioso o ablación facetaria por radiofrecuencia</li> <li>• Procedimientos intradisco</li> <li>• Bloqueos simpáticos</li> <li>• Implante de estimuladores de nervio periférico</li> </ul> | <ul style="list-style-type: none"> <li>• Anestesia neuroaxial<sup>§</sup>: espinal, epidural, catéter epidural.</li> <li>• Bloqueos paravertebrales: paravertebral, plexo lumbar, plexo cervical profundo</li> <li>• Prueba y colocación de neuroestimuladores espinales</li> <li>• Colocación de catéteres y bombas intratecales</li> <li>• Vertebroplastia y cifoplastia<sup>†</sup></li> <li>• Epiduroscopia, descompresión epidural</li> </ul> |

---

## ANGIOLOGÍA Y CIRUGÍA VASCULAR

- Flebectomía
- Procedimientos percutáneos arteriales que precisen introductor < 8 French
- Fístulas arterio-venosas sencillas
- Reparación endovascular de aneurismas
- Cirugía vascular de cabeza y cuello
- Bypass extra-anatómico
- Procedimientos percutáneos arteriales que precisen introductor > 8 French
- Revascularización arterial o venosa profunda de miembros inferiores
- Fístulas arterio-venosas complejas
- Cirugía abierta toraco-abdominal

---

## CARDIOLOGÍA INTERVENCIONISTA

- Procedimientos coronarios
  - Coronariografía diagnóstica transradial o transfemoral\*
  - ICP transradial\*
- Estudios electrofisiológicos y ablaciones
  - Estudio electrofisiológico diagnóstico\*
  - Ablación de TSV
  - Ablación endocárdica de TV
- Dispositivos
  - Implante subcutáneo transvenoso de MCP, DAI, CRT\*
  - Implante Holter subcutáneo\*
  - Recambio de generador de marcapasos, desfibrilador o
- Procedimientos coronarios
  - ICP transfemoral
- Intervencionismo estructural
  - Valvuloplastia mitral\*\*\*
  - Reparación percutánea mitral\*\*\*
  - Cierre percutáneo orejuela\*\*\*
- Ablaciones
  - Ablación de fibrilación auricular con aislamiento de venas pulmonares
- Otros
  - Balón de contrapulsación intraaórtico
  - Pericardiocentesis
- Intervencionismo estructural
  - Valvuloplastia aórtica
  - Implante válvula aórtica transcáteter
- Ablaciones
  - Ablación epicárdica de TV
- Dispositivos
  - Implante MCP sin cables
  - Extracción de electrodo (mecánica o asistida por láser)
- Otros
  - Dispositivo soporte circulatorio



---

resincronizador\*

- Otros
  - Cateterismo cardiaco derecho\*\*
  - Marcapasos transitorio

---

**CIRUGÍA  
CARDIOVASCULAR**

- Ventana pericárdica subxifoidea

- CRC no urgente (con o sin circulación extracorpórea)
- Cirugía valvular mitral / aórtica
- Cirugía de aorta ascendente
- Implantación marcapasos diafragmático

- CRC urgente (con o sin circulación extracorpórea)
- Disección de aorta ascendente/arco
- Cirugía complicaciones mecánicas IAM
- Cirugía valvular urgente / endocarditis
- Cirugía urgente tras iatrogenia posintervencionismo
- Reintervención coronaria y/o valvular
- Pericardiectomía (tras o en pericarditis constrictiva)

---

**CIRUGÍA GENERAL  
(incluye ORL)**

- Cirugía menor piel y tejido subcutáneo\*
- Cirugía pared abdominal no compleja (hernias inguinales unilaterales, umbilicales y epigástricas pequeñas)
- Cirugía proctológica no compleja (hemorroides, fístulas, fisuras)
- Procedimientos ORL menores (pólipos)

- Cirugía cáncer colorrectal programada abierta o laparoscopia
- Cirugía urgente por complicaciones, reintervenciones y procesos inflamatorios evolucionados (fuga anastomótica, perforaciones, divertículos)
- Cirugía biliar urgente (colecistitis, colangitis)
- Cirugía hepática menor
- Cirugía esófago-gástrica programada compleja (reintervenciones, hernias

- Cirugía hepática mayor programada (hepatectomías, metastectomías)
  - Cirugía pancreática
  - Cirugía oncológica compleja con linfadenectomías amplias
  - Cirugía para el tratamiento de las hemorragias digestivas (úlceras, divertículos, angiodisplasias)
  - Cirugía endocrina: tiroidectomía total, reintervenciones y vaciamientos cervicales, adrenalectomía por un tumor maligno)
  - Traumatismos abdominales graves
-

---

|                                          |                                                                                                                                                                                                               |                                                                                                                                                                                                                                                                                                                                                                                                                                                                                                                                                                                                                                                                                               |                                                                                                                                                                                                                                                                                                                                                                                                                                                                                                                        |
|------------------------------------------|---------------------------------------------------------------------------------------------------------------------------------------------------------------------------------------------------------------|-----------------------------------------------------------------------------------------------------------------------------------------------------------------------------------------------------------------------------------------------------------------------------------------------------------------------------------------------------------------------------------------------------------------------------------------------------------------------------------------------------------------------------------------------------------------------------------------------------------------------------------------------------------------------------------------------|------------------------------------------------------------------------------------------------------------------------------------------------------------------------------------------------------------------------------------------------------------------------------------------------------------------------------------------------------------------------------------------------------------------------------------------------------------------------------------------------------------------------|
|                                          |                                                                                                                                                                                                               | <ul style="list-style-type: none"><li>paraesofágicas, vólvulo gástrico)</li><li>• Cirugía mayor pared abdominal (eventraciones, reintervenciones por complicaciones y recidivas)</li><li>• Laparotomía / Laparoscopia programada para procesos no oncológicos (apendicectomía, colecistectomía no complicada, hernia hiato, resección gástrica)</li><li>• Cirugía endocrina (hemitiroidectomía, paratiroidectomía, quiste tirogloso, adrenalectomía por proceso benigno)</li><li>• Cirugía bariátrica</li><li>• Esplenectomía programada</li><li>• Drenaje percutáneo de abscesos intra-abdominales o pélvicos</li><li>• Amigdalectomía</li><li>• Cirugía menor laríngea y del oído</li></ul> | <ul style="list-style-type: none"><li>• Cirugía oncológica ORL</li></ul>                                                                                                                                                                                                                                                                                                                                                                                                                                               |
| <b>CIRUGÍA PLÁSTICA Y RECONSTRUCTIVA</b> | <ul style="list-style-type: none"><li>• Injertos pequeños y colgajos locales</li><li>• Cirugía cutánea menor (biopsia escisional)</li><li>• Cirugía estética auricular</li><li>• Cirugía de la mano</li></ul> | <ul style="list-style-type: none"><li>• Úlceras crónicas en piernas</li><li>• Úlceras por presión</li><li>• Cirugía estética nariz</li><li>• Cirugía reconstrucción tronco y miembros</li><li>• Cirugía estética de la mama</li><li>• Cirugía del contorno corporal</li><li>• Microcirugía en general</li><li>• Enfermedad de Le Peyronie</li></ul>                                                                                                                                                                                                                                                                                                                                           | <ul style="list-style-type: none"><li>• Hemangiomas y malformaciones vasculares</li><li>• Quemaduras</li><li>• Cirugía de tumores cutáneos mayores</li><li>• Cirugía de tumores de cabeza y cuello</li><li>• Cirugía orbito-palpebral</li><li>• Cirugía traumatológica facial</li><li>• Cirugía de rejuvenecimiento facial</li><li>• Cirugía de trastornos identidad género</li><li>• Linfadenectomía cervical, axilar e inguinal</li><li>• Amputaciones de extremidades</li><li>• Reimplantes y trasplantes</li></ul> |

---

---

|                             |                                                                                                                                                                                                                                                                                                                                                                                                                                                                                                                                                                                                                                                             |                                                                                                                                                                                                                                                                                                                                                                                                                                                                                                                                                                                                                                                                    |
|-----------------------------|-------------------------------------------------------------------------------------------------------------------------------------------------------------------------------------------------------------------------------------------------------------------------------------------------------------------------------------------------------------------------------------------------------------------------------------------------------------------------------------------------------------------------------------------------------------------------------------------------------------------------------------------------------------|--------------------------------------------------------------------------------------------------------------------------------------------------------------------------------------------------------------------------------------------------------------------------------------------------------------------------------------------------------------------------------------------------------------------------------------------------------------------------------------------------------------------------------------------------------------------------------------------------------------------------------------------------------------------|
|                             |                                                                                                                                                                                                                                                                                                                                                                                                                                                                                                                                                                                                                                                             | <ul style="list-style-type: none"><li>• Cirugía de la mediastinitis</li><li>• Infección necrosante de partes blandas</li></ul>                                                                                                                                                                                                                                                                                                                                                                                                                                                                                                                                     |
| <b>CIRUGÍA TORÁCICA</b>     | <ul style="list-style-type: none"><li>• Simpatectomía en la hiperhidrosis</li></ul>                                                                                                                                                                                                                                                                                                                                                                                                                                                                                                                                                                         | <ul style="list-style-type: none"><li>• Cirugía pulmonar (lobectomía, neumectomía, traumatismos, malformaciones, decorticación)</li><li>• Cirugía de la pared torácica, traquea y bronquios (malformaciones, traumatismos, tumores)</li><li>• Cirugía de la pleura: biopsia pleural, tumores</li><li>• Cirugía de mediastino, estrecho superior del tórax y diafragma, incluida esofaguectomía</li></ul>                                                                                                                                                                                                                                                           |
| <b>ENDOSCOPIA DIGESTIVA</b> | <ul style="list-style-type: none"><li>• Diagnóstico (EGD, colonoscopia, sigmoidoscopia flexible) incluyendo biopsia de la mucosa*</li><li>• CPRE con colocación de <i>stent</i> (biliar o pancreático) o dilatación papilar de balón sin esfinterotomía</li><li>• Enteroscopia de pulsión.</li><li>• Enteroscopia asistida por balón sólo con fines diagnósticos</li><li>• Cápsula endoscópica</li><li>• Colocación de prótesis enterales</li><li>• Ecoendoscopia sin PAAF.</li><li>• Electrocoagulación con argón plasma de lesiones digestivas ni extensas (angiodisplasias, etc.)</li><li>• Ablación de esófago de Barrett con radiofrecuencia</li></ul> | <ul style="list-style-type: none"><li>• Polipectomía</li><li>• Resección endoscópica mucosa</li><li>• Disección submucosa endoscópica</li><li>• CPRE con Esfinterotomía biliar o pancreática</li><li>• Ampulectomía</li><li>• Colocación de gastrostomía endoscópica percutánea</li><li>• Colocación de yeyunostomía endoscópica percutánea</li><li>• Colocación de colostomía endoscópica percutánea</li><li>• Enteroscopia terapéutica con balón asistido</li><li>• Ecoendoscopia con PAAF o biopsia</li><li>• Ecoendoscopia intervencionista</li><li>• Ablación tumoral</li><li>• Técnicas de Hemostasia endoscópica</li><li>• Tratamiento de varices</li></ul> |

---

---

|                                  |                                                                                                                                                                                                                                                                                                                            |                                                                                                                                                                                                                           |                                                                                                                                                                                                                                                                                                                                                                                                                                                                                         |
|----------------------------------|----------------------------------------------------------------------------------------------------------------------------------------------------------------------------------------------------------------------------------------------------------------------------------------------------------------------------|---------------------------------------------------------------------------------------------------------------------------------------------------------------------------------------------------------------------------|-----------------------------------------------------------------------------------------------------------------------------------------------------------------------------------------------------------------------------------------------------------------------------------------------------------------------------------------------------------------------------------------------------------------------------------------------------------------------------------------|
|                                  |                                                                                                                                                                                                                                                                                                                            |                                                                                                                                                                                                                           | <ul style="list-style-type: none"><li>• Dilatación neumática o con bujías</li><li>• Drenajes por ecografía</li><li>• Técnicas de terapia de tumores hepáticos por ecografía (radiofrecuencia, alcoholización, etc.)</li><li>• Biopsia hepática</li></ul>                                                                                                                                                                                                                                |
| <b>GINECOLOGÍA Y OBSTETRICIA</b> | <ul style="list-style-type: none"><li>• Histeroscopia</li><li>• Conización / biopsia cervical</li><li>• Nódulos de mama</li><li>• Drenaje-marsupialización glándula de Bartolino</li><li>• Amniocentesis / Biopsia corial</li></ul>                                                                                        | <ul style="list-style-type: none"><li>• Histerectomía simple</li><li>• Cuadrantectomía mamaria</li><li>• Quistectomía ovárica</li><li>• Cesárea programada sin factores de riesgo</li></ul>                               | <ul style="list-style-type: none"><li>• Mastectomía total (con/sin linfadenectomía)</li><li>• Cirugía de estadiaje oncológico</li><li>• Linfadenectomía pélvica o para-aórtica</li><li>• Histerectomía radical</li><li>• Miomectomía</li><li>• Cesárea complicada (placenta previa, <i>abruptio</i>)</li></ul>                                                                                                                                                                          |
| <b>NEUMOLOGÍA</b>                | <ul style="list-style-type: none"><li>• Broncoscopia diagnóstica</li><li>• Lavado broncoalveolar</li><li>• Cepillado bronquial</li><li>• Toracocentesis con control ecográfico</li><li>• Catéter pleural tunelizado con control ecográfico</li><li>• Inserción de tubo de drenaje pleural con control ecográfico</li></ul> | <ul style="list-style-type: none"><li>• Toracocentesis sin control ecográfico</li><li>• Catéter pleural tunelizado sin control ecográfico</li><li>• Inserción de tubo de drenaje pleural sin control ecográfico</li></ul> | <ul style="list-style-type: none"><li>• Biopsia bronquial / transbronquial / criobiopsia</li><li>• PAAF sin control ecográfico</li><li>• Ecobroncoscopia con PAAF transbronquial</li><li>• Resección tumoral láser/electrocoagulación / criorecanalización</li><li>• Implantación prótesis</li><li>• Dilatación bronquial/traqueal</li><li>• Broncoscopia rígida</li><li>• Extracción cuerpo extraño</li><li>• Biopsia pleural cerrada / transtorácica</li><li>• Toracoscopia</li></ul> |

---

---

## NEUROCIRUGÍA

- Cirugía menor bajo anestesia local:
- Biopsia muscular
  - Biopsia nervio periférico
  - Revisión de herida quirúrgica
  - Angiografía cerebral
  - Procedimientos percutáneos espinales: facetarias y rizólisis

Procedimientos mínimamente invasivos:

- *Stent* carotídeo
- Descompresión de nervios periféricos
- Acceso percutáneo a trigémino
- Cifoplastia/vertebroplastia<sup>†</sup>
- Punción lumbar<sup>†</sup>
- Procedimientos percutáneos espinales: epidurales, transforaminales y caudales
- Instrumentación espinal percutánea sin acceso al canal espinal

Procedimientos invasivos:

- Craneotomía/craniectomía
- Biopsias cerebrales o medulares
- Cirugía de raquis compleja o con acceso al canal espinal (Laminectomía, discectomía, corrección de deformidad, etc)
- Endarterectomía carotídea
- Embolizaciones (intracraneal/medular)
- Embolectomía mecánica
- Estimulación cerebral profunda, electrodos cerebrales profundos.
- Derivaciones de LCR (derivación ventriculoperitoneal, ventriculoatrial, lumboperitoneal, drenaje lumbar continuo y drenaje ventricular externo)
- Cirugía transesfenoidal y cirugía endoscópica de base de cráneo

---

## ODONTOLOGÍA Y CIRUGÍA MAXILOFACIAL

- Procedimientos de diagnóstico:
  - Exploración dental \*
  - Exploración periodontal (sondaje)
  - Radiografía convencional (panorámica, periapicales,...)\*
  - Sialografía
  - Artograma de la articulación témporo-mandibular.
- Procedimientos de odontología

- Procedimientos de cirugía oral o maxilofacial:
  - Excisión de tumor maligno intraóseo  $\geq 1,25$  cm
  - Suturas complicadas mayores de 5cm.
  - Resección radical de maxilar superior o mandíbula
  - Incisión y drenaje de abscesos intra/extraorales

- Osteoplastia/Ostectomía por deformidades ortognáticas
  - Procedimientos quirúrgicos LeFort I/II/III
-

- 
- restauradora\*: obturaciones (*"empastes"*), reconstrucciones, incrustaciones, *inlays*, *onlays*, carrillas, etc
  - Procedimientos de prostodoncia\*: prótesis fija (*"coronas o puentes"*) o removible (*"dentaduras"*)
  - Procedimientos de prótesis maxilofacial\*
  - Procedimientos de ortodoncia\*
  - Procedimientos de Endodoncia
    - Tratamiento de conductos\*
    - Cirugía apical o apicectomías
    - Resecciones radiculares quirúrgicas
  - Procedimientos de Cirugía oral o Maxilofacial:
    - Extracciones dentarias (convencionales o quirúrgicas)
    - Alveoloplastia / vestibuloplastia/excisión de tejidos blandos.
    - Frenectomía
    - Extirpación de tumoraciones o quistes (excepto malignos intraóseos  $\geq 1,25$  cm)
    - Cirugía pre-protésica
  - Procedimientos de Periodoncia:
    - Profilaxis (*"limpiezas"*)
    - Raspados y alisados
- con afectación de múltiples espacios fasciales
  - Reducción de fracturas óseas complicadas con fijación y múltiples accesos quirúrgicos.
  - Artroplastia/reconstrucción articulación temporomandibular
  - Traqueotomía de emergencia
-

- radicales (incorrectamente llamados "curetajes")
- Cirugías periodontales resectivas, regenerativas o mucogingivales.
- Procedimientos con implantes dentales:
  - Colocación convencional de implantes.
  - Técnica de regeneración simultáneas o diferidas a la colocación de los implantes

## OFTALMOLOGÍA

- Procedimientos con anestesia tópica\*
- Cirugía del segmento anterior:
  - Cataratas
  - Queratoplastia lamelar
  - Queratoplastia penetrante
  - Trasplante membrana amniótica
  - Implante segmentos intraestromales
  - *Cross-linking* corneal
  - Cirugía refractiva (láser corneal)
- Cirugía de estrabismo:
  - Inyección toxina botulínica
- Cirugía de retina:
  - Inyección intravítrea fármacos
  - Fotocoagulación láser
  - Cerclaje o indentación escleral
- Cirugía de órbita y anejos oculares:
  - Cauterización de pestañas
- Procedimientos con anestesia retrobulbar
- Cirugía del segmento anterior:
  - Lesiones conjuntivales
  - Pterigion
  - Reconstrucciones iris, pupiloplastia, implante secundario de lesiones intraoculares suturadas / ancladas a iris
- Cirugía de estrabismo:
  - Cirugía de uno o varios músculos
- Cirugía de retina:
  - Vitrectomía (en retinopatía diabética proliferativa tendencia a resangrado posquirúrgico)
  - Facovitrectomía
- Cirugía de órbita y anejos oculares:
  - Cirugía reconstructiva con injertos,

- 
- Sondaje vía lagrimal con/sin implante
  - Conjuntivoplastia
  - Extirpación / biopsia de lesiones menores palpebrales (tumores, chalación, quiste,...)
  - Cirugía de glaucoma:
    - Goniotomía
    - colgajos o implantes
    - Malposiciones palpebrales
    - Blefaroplastia, cejaplastia
    - Cirugía vía lagrimal
    - Cirugía orbitaria (tumores, fracturas,...)
  - Cirugía de glaucoma:
    - Trabeculectomía
    - Facotrabeculectomía
    - Implante de sistemas de drenaje valvular
- 

**RADIOLOGÍA  
VASCULAR E  
INTERVENCIONISTA**

- PAAF o BAG órgano superficial (excluyendo localizaciones intratorácicas e intraabdominales): tiroides, mama, ganglio linfático superficial, parótida, bultomas superficiales.
  - Punciones terapéuticas en territorio osteoarticular (infiltraciones corticoides, lavado calcio en tendón supraespinoso, inyección de PRFC en tendinitis, aspiración de ganglión)
  - Recambio de catéter de drenaje (biliar, nefrostomía, absceso)
  - Toracocentesis evacuadora simple
  - Paracentesis evacuadora simple
  - Drenaje de absceso superficial
  - Punciones venosas diagnósticas y/o terapéuticas: colocación y retirada de filtros cava, tratamiento percutáneo de varicocele
  - Termoablación de osteoma osteoide y metástasis óseas
  - Dilataciones y *stents* en tubo digestivo<sup>†</sup>
  - Drenaje pleural<sup>†</sup>
  - Retirada de Reservoirio subcutáneo
  - Catéter tunelizado para hemodiálisis u oncología
  - Angioplastia y trombectomía en accesos vasculares para hemodialisis
  - Biopsia hepática/renal
  - Termoablación percutánea hepática, renal o pulmonar
  - Intervención biliar (nuevo trayecto)
  - Intervencionismo arterial: embolizaciones, quimio y radioembolización, angioplastia/*stent*, quimioterapia intraarterial, fibrinolisis local, endoprótesis vasculares, tratamiento percutáneo del ictus
  - Trombolisis farmacomecánica del TEV.
  - TIPS
  - Colocación de reservorio subcutáneo
  - Drenaje de absceso o PAAF en órgano profundo
  - BAG intraabdominal, retroperitoneal, en la pared torácica o pulmonar
  - Nefrostomía/Gastrostomía Colecistostomía
-



masculino o femenino, *stent* venoso, catéter yugular o femoral no tunelizado, toma de muestras venosas, fleboesclerosis de malformaciones venosas, etc.

- Tratamiento con radiofrecuencia o laser de varices en miembros inferiores
- Dacriocistografías, sialografías
- Arteriografía diagnóstica
- Procedimientos espinales: bloqueo facetario

percutáneas y/o catéteres doble J percutáneos, colocación inicial<sup>†</sup>

- Procedimientos espinales: vertebroplastia, cifoplastia, punción lumbar, inyección epidural<sup>†</sup>

## TRAUMATOLOGÍA Y CIRUGÍA ORTOPÉDICA

- Punción articular y/o artrocentesis\*
- Artroscopia rodilla (incluyendo plastias de ligamentos cruzados)
- Artroscopia hombro (descompresión subacromial, reparación de manguito rotador)
- Cirugía de la inestabilidad del hombro (artroscopia y abierta)
- Cirugía del tobillo (incluyendo osteosíntesis)
- Cirugía del antepie (deformidades y fracturas)
- Cirugía ortopédica del retropié
- Cirugía de las fracturas de los huesos del tarso
- Cirugía de la mano (partes blandas, lesiones tumorales benignas y tendinosas)
- Cirugía de las lesiones traumáticas de los tendones de muñeca y mano
- Cirugía de las lesiones compresivas de los nervios periféricos del miembro superior
- Cirugía de la fractura del radio distal y diáfisis
- Cirugía de la fractura de cadera (prótesis parcial y osteosíntesis)
- Artroplastia primaria de cadera
- Artroplastia primaria de rodilla
- Cirugía de la fractura de fémur (diafisaria y distal)
- Cirugía de la fractura de la tibia (proximal y diafisaria)
- Cirugía de la fractura del húmero (proximal y diafisaria)
- Artroplastia del hombro
- Cirugía de la columna cervical
- Artrodesis de la columna lumbar (hasta 2 niveles abierta y procedimientos mínimamente invasivos (XLIF, TLIF, etc.))
- Cirugía ortopédica oncológica (tumores de partes blandas)
- Artroplastia de cadera bilateral
- Artroplastia de rodilla bilateral
- Revisiones de artroplastia de cadera
- Revisiones de artroplastia de rodilla
- Cirugía de la columna lumbar (artrodesis circunferencial mayor de 2 niveles abierta)
- Cirugía de las deformidades raquídeas (escoliosis)
- Cirugía de la fractura de la pelvis y sacro
- Politraumatizados
- Cirugía ortopédica oncológica (resección de tumores óseos con reconstrucción)

---

de huesos del antebrazo

- Cirugía de las fracturas articulares del codo
- Cirugía de partes blandas del codo

---

**UROLOGÍA**

- Cirugías genitales externos masculinos
- Cirugía incontinencia urinaria femenina
- Cirugía endoscópica retrógrada litiasis ureteral
- Cistoscopia y derivaciones retrógradas
- Cirugía percutánea renal
- Cirugía endoscópica vejiga/próstata
- Biopsia de próstata
- Cirugía reconstructiva uretral y retroperitoneo
- Cirugía exerética urológica (oncológica y no oncológica)
- Trasplante renal
- Donante vivo

---

**OTROS**

- Aspirado de médula ósea
- Inyección intramuscular
- Biopsia de Médula ósea

---

ICP: intervención coronaria percutánea. TSV: taquicardia supraventricular. TV: taquicardia ventricular. MCP: marcapasos. DAI: desfibrilador automático implantable. TRC: terapia resincronización cardiaca. CRC: cirugía revascularización coronaria. IAM: infarto agudo miocardio. ORL: otorrinolaringología. EGD: endoscopia gastro-duodenal. CPRE: colangiopancreatografía retrógrada endoscópica. PAAF: punción aspiración aguja fina. BAG: biopsia aguja gruesa. TEV: tromboembolismo venoso. TIPS: *shunt* porto-sistémico transyugular intrahepático. PRFC: plasma rico en factores de crecimiento. RTU: resección transuretral.

\*Procedimientos de bajo riesgo donde el posible sangrado sea clínicamente poco importante y asumible por el operador.

\*\*El riesgo de sangrado es bajo, pero debido a la potencial gravedad de la hemorragia puede ser manejado de igual manera que un procedimiento de riesgo intermedio.

\*\*\*El riesgo de sangrado de estos procedimientos se considera intermedio, aunque debido a la potencial gravedad de la hemorragia pueden ser manejados de igual manera que los procedimientos de alto riesgo hemorrágico.

†Algunos procedimientos, en función del tipo de especialidad que los realice, pueden ser considerados como de riesgo medio o alto, por lo que se recomienda individualizar.

§El uso de aspirina no contraindica la realización de técnicas neuroaxiales.

## Tabla 2 del material suplementario

Características farmacológicas y farmacocinéticas de los anticoagulantes directos

|                                      | <b>DABIGATRÁN</b>       | <b>RIVAROXABÁN</b>                      | <b>APIXABÁN</b>          | <b>EDOXABÁN</b>          |
|--------------------------------------|-------------------------|-----------------------------------------|--------------------------|--------------------------|
| Diana                                | Factor IIa              | Factor Xa                               | Factor Xa                | Factor Xa                |
| Peso molecular (Da)                  | 628                     | 436                                     | 460                      | 548                      |
| Biodisponibilidad oral (%)           | 6,5                     | 80-100*                                 | 66                       | 50                       |
| Fijación a proteínas plasmáticas (%) | 35                      | 95                                      | 87                       | 40-59                    |
| Dosis**                              | Fija, dos veces al día  | Fija, una vez al día                    | Fija, dos veces al día   | Fija, una vez al día     |
| Profármaco                           | Sí                      | No                                      | No                       | No                       |
| Vida media (h)                       | 12-17                   | 5-13                                    | 9-14                     | 10-14                    |
| Tmax (h)                             | 2                       | 3                                       | 3                        | 1-2                      |
| Necesidad de Monitorización          | No                      | No                                      | No                       | No                       |
| Eliminación renal (%)                | 80                      | 33                                      | 27                       | 50                       |
| Dializable                           | Sí                      | No                                      | No                       | No                       |
| Metabolismo CYP                      | No                      | 30% (CYP3A4, CYP2J2)                    | 15% CYP3A4               | < 4% CYP3A4              |
| Transporte de Gp-P                   | Sí                      | Sí                                      | Sí                       | Sí                       |
| Interacciones potenciales con        | Rifampicina, quinidina, | Inhibidores potentes del CYP3A4 y Gp-P, | Inhibidores potentes del | Inhibidores potentes del |

|          |                                                          |                                                |                     |                     |
|----------|----------------------------------------------------------|------------------------------------------------|---------------------|---------------------|
| fármacos | amiodarona,<br>inhibidores potentes<br>Gp-P <sup>†</sup> | inductores potentes del<br>CYP3A4 <sup>†</sup> | CYP3A4 <sup>†</sup> | CYP3A4 <sup>†</sup> |
|----------|----------------------------------------------------------|------------------------------------------------|---------------------|---------------------|

Tmax: tiempo hasta la concentración máxima. CYP: citocromo p450 isoenzimas. Gp-P: glucoproteína P.

\*Máxima biodisponibilidad si se ingiere con las comidas.

\*\*Para la indicación en prevención de ictus y embolia sistémica en fibrilación auricular no valvular.

<sup>†</sup>Incluyen antimicóticos azólicos (ketoconazol, itraconazol, etc.) e inhibidores de la proteasa para el tratamiento del VIH, como el ritonavir.

### Tabla 3 del material suplementario

Antagonistas orales del receptor ADP-P2Y<sub>12</sub>

|                                         | <b>Clopidogrel</b>            | <b>Prasugrel</b>         | <b>Ticagrelor</b>               |
|-----------------------------------------|-------------------------------|--------------------------|---------------------------------|
| Grupo                                   | Tienopiridina                 | Tienopiridina            | Ciclopentiltriazolopirimidina   |
| Dosis                                   | DC: 300-600mg<br>DM: 75mg/día | DC: 60mg<br>DM: 10mg/día | DC: 180mg<br>DM: 90 ó 60mg/12h* |
| Unión al receptor                       | Irreversible                  | Irreversible             | Reversible                      |
| Inicio de acción tras la dosis de carga | 2-6 horas                     | 30 min                   | 30 min                          |
| Suspensión antes de cirugía             | 5 días                        | 7 días                   | 3-5 días                        |

DC: dosis de carga; DM: dosis de mantenimiento.

\* Según indicación (ver texto).

## BIBLIOGRAFÍA

1. Spyropoulos AC, Al-Badri A, Sherwood MW, Douketis JD. Perioperative management of patients receiving a vitamin K antagonist or a direct oral anticoagulant requiring an elective procedure or surgery. *J Thromb Haemost.* 2016;14:875-885.
2. Doherty JU, Gluckman TJ, Hucker WJ, et al. 2017 ACC Expert Consensus Decision Pathway for Perioperative Management of Anticoagulation in Patients With Nonvalvular Atrial Fibrillation: A Report of the American College of Cardiology Clinical Expert Consensus Document Task Force. *J Am Coll Cardiol.* 2017;69:871-898.
3. Rossini R, Musumeci G, Visconti LO, et al. Perioperative management of antiplatelet therapy in patients with coronary stents undergoing cardiac and non-cardiac surgery: a consensus document from Italian cardiological, surgical and anaesthesiological societies. *EuroIntervention.* 2014;10:38-46.
4. Sierra P, Gómez-Luque A, Castillo J, Llau JV. Clinical practice guidelines for the perioperative management of antiplatelet therapy in noncardiac surgery (Sociedad Española de Anestesiología y Reanimación). *Rev Esp Anestesiología y Reanimación.* 2011;58:243-50.
5. Ferrandis R, Castillo J, De Andrés J, et al. The perioperative management of new direct oral anticoagulants: a question without answers. *Thromb Haemost.* 2013;110:515-522.
6. Alberca F, Marín F, Rodán V, Carballo F. Manejo de los fármacos antitrombóticos asociados a los procedimientos digestivos. *Rev Esp Enferm Dig.* 2015;107:289-306.
7. Perry JD, Noakes TJ, Helliwell PS; British Dental Society. Guidelines for the management of patients on oral anticoagulants requiring dental surgery. *Br Dent J.* 2007;203:389-393.
8. Veltri A, Bargellini I, Giorgi L, Almeida PAMS, Akhan O. CIRSE Guidelines on Percutaneous Needle Biopsy (PNB). *Cardiovasc Intervent Radiol.* 2017. <http://dx.doi/10.1007/s00270-017-1658-5>.
9. Narouze S, Benzon HT, Provenzano DA, et al. Interventional spine and pain procedures in patients on antiplatelet and anticoagulant medications: guidelines from the American Society of Regional Anesthesia and Pain Medicine, the European Society of Regional

- Anaesthesia and Pain Therapy, the American Academy of Pain Medicine, the International Neuromodulation Society, the North American Neuromodulation Society, and the World Institute of Pain. *Reg Anesth Pain Med*. 2015;40:182-212.
10. Harrop-Griffiths W, Cook T, Gill H, et al. Regional anaesthesia and patients with abnormalities of coagulation: the Association of Anaesthetists of Great Britain & Ireland The Obstetric Anaesthetists' Association Regional Anaesthesia UK. *Anaesthesia*. 2013;68:966-972.
  11. Warkentin TE, Cook RJ, Marder VJ, et al. Anti-platelet factor 4/heparin antibodies in orthopedic surgery patients receiving antithrombotic prophylaxis with fondaparinux or enoxaparin. *Blood*. 2005;106:3791-3796.
  12. Ansell J, Hirsh J, Hylek E, Jacobson A, Crowther M, Palareti G. Pharmacology and management of the vitamin K antagonists: American College of Chest Physicians Evidence-Based Clinical Practice Guidelines (8th Edition). *Chest*. 2008;133(6 Suppl):160S-198S.
  13. Ogilvie IM, Newton N, Welner SA, Cowel W, Lyp GY. Underuse of oral anticoagulants in atrial fibrillation: a systematic review. *Am J Med*. 2010;123:638-645.
  14. Nieuwlaat R, Capucci A, Camm AJ, et al. Atrial fibrillation management: a prospective survey in ESC member countries. The Euro Heart Survey on Atrial Fibrillation. *Eur Heart J*. 2005;26:2422-2434.
  15. Connolly SJ, Ezekowitz MD, Yusuf S, et al. Dabigatran versus warfarin in patients with atrial fibrillation. *N Engl J Med*. 2009;361:1139-1151.
  16. Patel MR, Mahaffey KW, Garg J, et al. Rivaroxaban versus warfarin in nonvalvular atrial fibrillation. *N Engl J Med*. 2011;365:883-891.
  17. Granger CB, Alexander JH, McMurray JJ, et al. Apixaban versus warfarin in patients with atrial fibrillation. *N Engl J Med*. 2011;365:981-992.
  18. Giugliano RP, Ruff CT, Braunwald E, et al. Edoxaban versus warfarin in patients with atrial fibrillation. *N Engl J Med*. 2013;369:2093-2104.
  19. Mateo J. Nuevos anticoagulantes orales y su papel en la práctica clínica. *Rev Esp Cardiol Supl*. 2013;13(C):33-41.



20. Kirchhof P, Benussi S, Kotecha D, et al. 2016 ESC Guidelines for the management of atrial fibrillation developed in collaboration with EACTS. *Eur Heart J*. 2016;37:2893-2962.
21. Patrono C, García Rodríguez LA, Landolfi R, Baigent C. Low-dose aspirin for the prevention of atherothrombosis. *N Engl J Med*. 2005;353:2373-2383.
22. Roffi M, Patrono C, Collet JP, et al. 2015 ESC Guidelines for the management of acute coronary syndromes in patients presenting without persistent ST-segment elevation. *Eur Heart J*. 2016;37:267-315.
23. Ibanez B, James S, Agewall S, et al. 2017 ESC Guidelines for the management of acute myocardial infarction in patients presenting with ST-segment elevation. *Eur Heart J*. 2017. <http://doi.org/10.1093/eurheartj/ehx393>
24. Aboyans V, Ricco JB, Bartelink MEL, et al. 2017 ESC Guidelines on the Diagnosis and Treatment of Peripheral Arterial Diseases, in collaboration with the European Society for Vascular Surgery (ESVS). *Eur Heart J*. 2017. doi:10.1093/eurheartj/ehx095
25. Piepoli MF, Hoes AW, Agewall S, et al. 2016 European Guidelines on cardiovascular disease prevention in clinical practice. *Eur Heart J*. 2016;37:2315-2381.
26. Valgimigli M, Bueno H, Byrne RA, et al. 2017 ESC focused update on dual antiplatelet therapy in coronary artery disease developed in collaboration with EACTS. *Eur Heart J*. 2017. <http://doi.org/10.1093/eurheartj/ehx419>.
27. Levine GN, Bates ER, Bittl JA, et al. 2016 ACC/AHA Guideline Focused Update on Duration of Dual Antiplatelet Therapy in Patients With Coronary Artery Disease: A Report of the American College of Cardiology/American Heart Association Task Force on Clinical Practice Guidelines: An Update of the 2011 ACCF/AHA/SCAI Guideline for Percutaneous Coronary Intervention, 2011 ACCF/AHA Guideline for Coronary Artery Bypass Graft Surgery, 2012 ACC/AHA/ACP/AATS/PCNA/SCAI/STS Guideline for the Diagnosis and Management of Patients With Stable Ischemic Heart Disease, 2013 ACCF/AHA Guideline for the Management of ST-Elevation Myocardial Infarction, 2014 AHA/ACC Guideline for the Management of Patients With Non-ST-Elevation Acute Coronary Syndromes, and 2014 ACC/AHA Guideline on Perioperative Cardiovascular Evaluation and Management of Patients Undergoing Noncardiac Surgery. *Circulation*. 2016;134:e123-155.

28. Ferreiro JL, Angiolillo DJ. New directions in antiplatelet therapy. *Circ Cardiovasc Interv.* 2012;5:433-445.
29. Bertrand ME, Rupprecht HJ, Urban P, Gershlick AH; CLASSICS Investigators. Double-blind study of the safety of clopidogrel with and without a loading dose in combination with aspirin compared with ticlopidine in combination with aspirin after coronary stenting: the clopidogrel aspirin stent international cooperative study (CLASSICS). *Circulation.* 2000;102:624-629.
30. Wiviott SD, Braunwald E, McCabe CH, et al. Prasugrel versus clopidogrel in patients with acute coronary syndromes. *N Engl J Med.* 2007;357:2001-2015.
31. Wallentin L, Becker RC, Budaj A, et al. Ticagrelor versus clopidogrel in patients with acute coronary syndromes. *N Engl J Med.* 2009;361:1045-1057.
32. Bonaca MP, Bhatt DL, Cohen M, et al. Long-term use of ticagrelor in patients with prior myocardial infarction. *N Engl J Med.* 2015;372:1791-1800.
